# Supplementary material for: Amorphous FeOOH nanoparticles decorated on defect-rich porous Ni MOF nanosheet based hierarchical architectures toward superior OER performance
Source: Royal Society of Chemistry journal article supplement (doi:10.1039/d2nj01385a), 2022-01-01
Supplement: d2nj01385a1.pdf [file d2nj01385a1.pdf]

## Supporting Information

### Amorphous FeOOH nanoparticles decorated on the defect-rich porous Ni MOF nanosheets based hierarchical architectures toward superior OER performance

Junnan Yao, Yajun Ji, \* Lijun Pei, Sufen Tan, Fuyong Ren

School of Materials and Chemistry, University of Shanghai for Science and Technology,  
Jungong Road 334#, 200093 Shanghai, China.

\*Corresponding author: E-mail: [jiyajun@usst.edu.cn](mailto:jiyajun@usst.edu.cn)

Fax: +86 21 65667144; Tel: +86 21 65667144

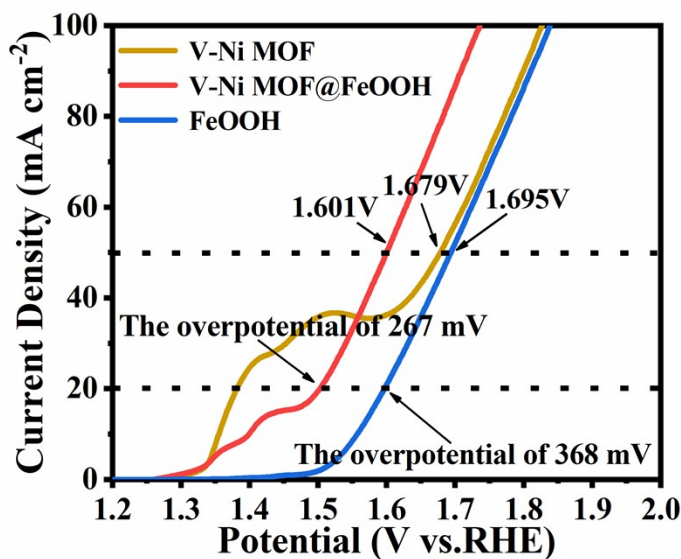

Fig. S1 LSV curves for V-Ni MOF, V-Ni MOF@FeOOH and FeOOH.

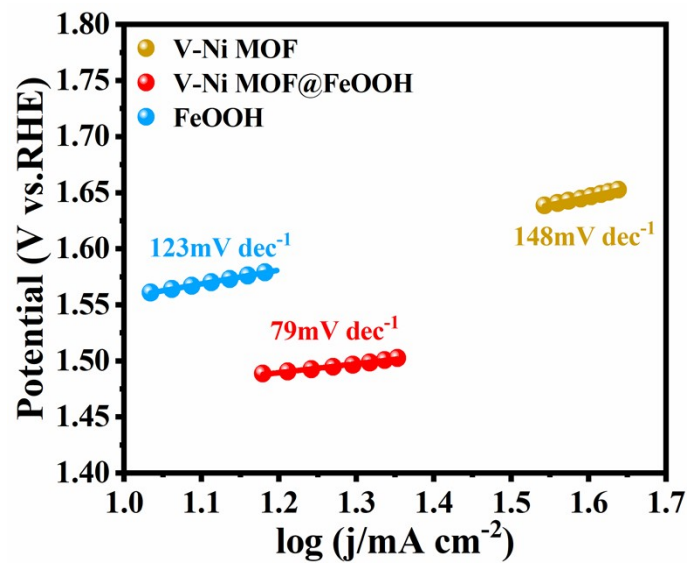

Fig. S2 Tafel slopes for V-Ni MOF, V-Ni MOF@FeOOH and FeOOH.

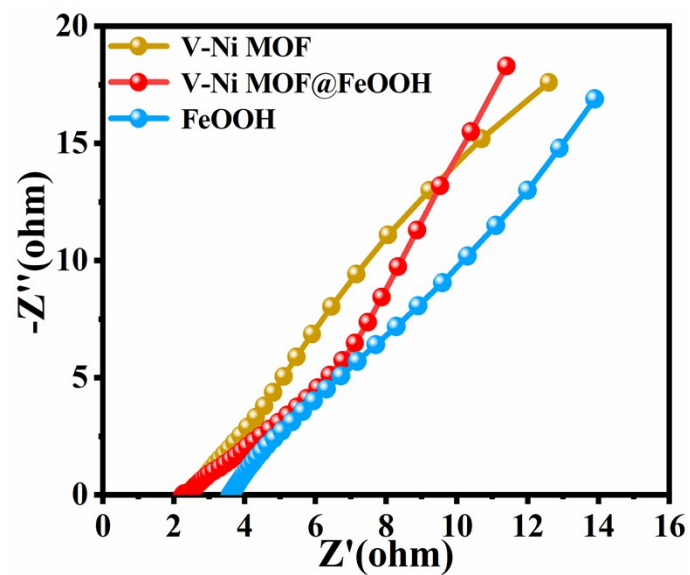

Fig. S3 EIS spectra for V-Ni MOF, V-Ni MOF@FeOOH and FeOOH.
